1 ***Mast cells and  $\gamma\delta$  T cells are largely dispensable for adaptive immune***  
2 ***responses after laser-mediated epicutaneous immunization***

3

4 Isabella Joubert<sup>1\*</sup>, Daniel Kovacs<sup>1,2\*</sup>, Sandra Scheiblhofer<sup>1</sup>, Petra Winter<sup>1</sup>, Evgeniia Korotchenko<sup>1</sup>,  
5 Helen Strandt<sup>1</sup>, Richard Weiss<sup>1</sup>

6

7 <sup>1</sup> Department of Biosciences, University of Salzburg, Salzburg, Austria

8 <sup>2</sup> current address: Department of Hematology and Medical Oncology, Klinikum rechts der Isar and  
9 TranslaTUM Cancer Center, Technische Universität München, München, Germany

10 \* authors contributed equally

11

12 **Corresponding author:**

13 Assoc. Univ.-Prof. Dr. Richard Weiss

14 University of Salzburg, Department of Biosciences

15 Hellbrunnerstraße 34, 5020 Salzburg, Austria

16

17 Keywords: epicutaneous vaccination, skin immunology, innate immunity, Phl p 5, glycoconjugates,  
18 mannan, barrier disruption

19

20

21

22

23 **Highlights**

- 24
  - Laser microporation induces an inflammatory chemokine milieu at the site of immunization

- 25       •  $\gamma\delta$  T cells and mast cells contribute to the steady-state or damage-induced cytokine milieu in  
26       the skin
- 27       •  $\gamma\delta$  T cells and mast cells are dispensable for adaptive immunity after laser-mediated  
28       immunization
- 29

30 **Abstract**

31 **Background**

32 The skin resembles an attractive target for vaccination due to its accessibility and abundance of  
33 resident immune cells. Cells like  $\gamma\delta$  T cells and mast cells (MCs) are part of the first line of defence  
34 against exogenous threats. Despite being important mediators for eliciting TH2 immune responses  
35 after epithelial stress,  $\gamma\delta$  T cell and MC function still remains to be completely understood. Here, we  
36 aimed to characterize their roles in shaping adaptive immune responses after laser-mediated  
37 epicutaneous immunization (EPI).

38 **Methods**

39  $\gamma\delta$  T cell knock out, MC depleted, and wildtype control mice were immunized with mannan-  
40 conjugated grass pollen allergen Phl p 5 (P5-MN) by laser-mediated EPI. After 2-3 immunizations,  
41 cytokine expression, T helper polarization, and antigen-specific IgG1/IgE levels were analysed. The  
42 local cytokine/chemokine milieu after laser microporation was determined.

43 **Results**

44 While the majority of inflammatory chemokines and cytokines induced by laser treatment was not  
45 affected by the presence of  $\gamma\delta$  T cells or MCs, RANTES, was elevated in  $\gamma\delta$  T cell knock out mice, and  
46 GRO $\alpha$  and TSLP, were significantly decreased after MC depletion. However, absence of  $\gamma\delta$  T cells or  
47 depletion of MC had no substantial effect on adaptive humoral or cellular immune responses after  
48 laser-mediated EPI, except for slightly reduced IgG1 and effector T cell levels in MC depleted mice.

49 **Conclusions**

50  $\gamma\delta$  T cells did not play a pivotal role in shaping the humoral and cellular adaptive immune response  
51 after laser-mediated EPI, whereas MC depletion decreased numbers of effector T cells, indicating a  
52 potential role of MCs in the activation and maturation of T cells after EPI.

53 **1. Introduction**

54 While vaccination via intramuscular (IM) or subcutaneous (SC) injection represents a straightforward  
55 and well-established method, in most cases, large doses of the respective vaccine are required to  
56 provide protective immunity. Moreover, due to the low number of resident antigen-presenting cells  
57 (APCs) in these target tissues, IM or SC inoculations require infiltrating leukocytes attracted by  
58 inflammatory signals at the site of vaccine administration [1]. To overcome the limitations of  
59 conventional injections, new methods have recently been developed with the focus on generating  
60 less invasive and more efficient delivery techniques for vaccines [2, 3].

61 Whereas some novel skin vaccination technologies rely on actual deposition of the vaccine within the  
62 skin, others aim at passive transport of the vaccine via barrier disrupted skin, e.g. by using laser  
63 microporation [3, 4]. Thereby, heat pulses are produced by highly focused thermal energy (e.g.  
64 infrared light) leading to thermal ablation at locally restricted skin areas [5] and thus generating skin  
65 micropores in a controlled manner by means of decomposition and vaporization of tissue. Laser  
66 microporation enables circumvention of the stratum corneum and promotes vaccine delivery to  
67 cutaneous APCs. In addition to enhanced antigen delivery, this technique provides an intrinsic  
68 adjuvant effect [6] and has shown promising results in prophylactic and therapeutic approaches  
69 against type I allergies and tumours in animal models [4, 7, 8].

70

71 As the barrier between host and environment, the skin is a highly immunocompetent organ  
72 harbouring diverse populations of resident immune cells including dendritic cells (DC), mast cells  
73 (MC), and  $\gamma\delta$  T cells, and thus represents an attractive target for vaccination [9]. While skin-resident  
74 APCs are continuously migrating to regional lymph nodes and the blood, sessile (epi)dermal cells are  
75 able to polarize immune responses by release of cytokines. An accumulating body of evidence  
76 suggests that vaccination via the skin enables dose sparing [10, 11], which is of special interest for  
77 treatment of immune-compromised and elderly patients as well as in cases of limited vaccine  
78 availability. The easily accessible upper layers of the skin furthermore allow for usage of smaller  
79 needles or even needle-free vaccination. This results in increased patient convenience and

80 compliance and reduces the risk of needle-stick injuries, thereby also offering advantages for  
81 healthcare providers [12].

82 In the context of epicutaneous immunization (EPI), antigens are delivered to APCs mostly via passive  
83 uptake. Based on the low efficiency of passive uptake, novel antigen formulations directly target  
84 receptors on skin-resident DCs to promote antigen uptake. One approach is to actively target DCs by  
85 engagement of their expressed C-type lectin receptors (CLRs) and thus significantly increase antigen  
86 uptake [13]. Not only does targeting CLRs increase antigen uptake and enhance immunogenicity, but  
87 also allows shaping of the subsequent immune responses [14]. CLRs comprise a large superfamily of  
88 receptors, which recognize diverse carbohydrate moieties in a calcium-dependent or independent  
89 manner through one or more conserved carbohydrate recognition domains (CRDs) or C-type lectin  
90 domains (CTLDs). CLRs have evolved alongside pathogens and are often specific for distinct and  
91 conserved carbohydrate motifs derived from viruses, bacteria, parasites or fungi [15]. A variety of  
92 immune cells express CLRs such as dermal DCs (dDCs), Langerhans cells (LCs), macrophages,  
93 neutrophils, and B lymphocytes. As pattern recognition receptors (PRRs), CLRs play various roles in  
94 eliciting immune responses depending on the detected pathogen-associated molecular pattern  
95 (PAMP). The potential of the carbohydrate mannan as an adjuvant capable of enhancing and shaping  
96 the overall immune response has been demonstrated to rely on its capacity to engage CLRs [16, 17].  
97 We have previously reported that EPI with allergen-mannan neoglycoconjugates by laser  
98 microporation leads to more efficient antigen uptake by dDCs and LCs. In addition, we found that the  
99 initiated immune response was skewed towards TH1/TH17, which is in accordance with the fungal  
100 origin of mannan [17].

101 Nevertheless, the immune response mounted upon an antigen encounter is also highly dependent on  
102 the microenvironment within the target tissue. Barrier disruption has been demonstrated to be  
103 essential for enhancing skin permeation by altering the microarchitecture of the skin and increasing  
104 the motility of embedded APCs. Furthermore, disrupting the stratum corneum has been shown to  
105 provide a natural inherent adjuvant effect by inducing the secretion of pro-inflammatory cytokines,  
106 chemokines and danger-associated molecular patterns (DAMPs) [18, 19]. More precisely, damaged

107 and necrotic keratinocytes release cytokines such as IL-25, IL-33 and TSLP (“alarmins”), which  
108 activate other skin-resident cells and induce specific immune responses [20].

109 MCs and  $\gamma\delta$  T cells are distributed throughout the whole body in the mucosal, epithelial and  
110 connective tissues. Hence, they are strategically positioned at the barrier between host and  
111 environment, where exogenous material can enter. They both play important roles in innate  
112 immunity and can be rapidly activated by stress signals and pathogens. The various protective  
113 functions exerted by  $\gamma\delta$  T cells include anti-microbial defence, tumour surveillance, tissue  
114 homeostasis, and wound repair [21, 22]. The term lymphoid stress-surveillance is commonly used to  
115 describe the rapidly induced immune response initiated after stress-antigen engagement by the  $\gamma\delta$  T  
116 cell receptor. Additionally,  $\gamma\delta$  T cells have been reported to directly sense epithelial dysregulation,  
117 control tissue homeostasis by IL-13 production and promote IgE-dependent responses to protein  
118 allergens in stressed tissue [23]. MCs are predominantly known for their essential role as mediators  
119 of type I allergy and for their potential to secrete a variety of allergic mediators upon activation [24].  
120 However, MCs cannot only be activated by antigen-dependent crosslinking of IgE:Fc $\epsilon$ RI, but also by a  
121 variety of other stimuli, such as cytokines, neuropeptides and danger signals [25, 26]. Thus, MCs can -  
122 depending on the context - elicit pro-inflammatory, anti-inflammatory as well as immunoregulatory  
123 responses by releasing distinct patterns of mediators and cytokines [24], [25].

124 In addition to their protective functions and their role in allergic diseases, both  $\gamma\delta$  T cells as well as  
125 MCs, are implicated in autoimmunity and malignancy, although the nature and extent of their  
126 involvement in the etiopathology is debated [27, 28].

127 In the present study, we investigated the role of  $\gamma\delta$  T cells and MCs in shaping the adaptive immune  
128 response following EPI using mannan-conjugated grass pollen allergen Phl p 5 after laser  
129 microporation of skin.

130

131 **2. Material and Methods**

132 **Generation of allergen-mannan neoglycoconjugates**

133 Allergen-mannan neoglycoconjugates were generated by mild oxidation of the mannan moiety and  
134 subsequent reductive amination with recombinant Phl p 5 (rPhlp 5) as previously described [17],  
135 using a ratio of 5:1 (w/w) between carbohydrate and allergen. For more details, see supplementary  
136 methods.

137

138 **Purification and characterization of Phl p 5-mannan neoglycoconjugates**

139 Phl p 5 mannan neoglycoconjugates (P5-MN) were subjected to size exclusion chromatography using  
140 a 16/60 Sephacryl S-300 HR column (GE Healthcare) (Suppl. Fig. 1). Coupling efficiency of individual  
141 glycoconjugate fractions was monitored by a 12.5% reducing SDS-PAGE using colloidal Coomassie  
142 staining for protein visualization after which high molecular weight fractions were pooled (Suppl. Fig.  
143 2). The hydrodynamic radius of this glycoconjugate pool was determined using dynamic light  
144 scattering (DLS). Measurements were performed at a protein concentration of 1 mg/mL in PBS at  
145 40% laser power for 20x5 seconds on a Viscotec DLS 802 dynamic light scattering instrument (Suppl.  
146 Fig. 3).

147

148 **Animal experiments**

149 *Mice*

150 Tcrdt<sup>m1Mom</sup> targeted mutant strain mice deficient in receptor expression in all adult lymphoid and  
151 epithelial organs were purchased from the Jackson Laboratory. Mice were backcrossed for 14  
152 generations to a BALB/c genetic background. For all experiments, homozygous T-cell receptor delta  
153 chain (TCRd) knock-out mice and heterozygous littermates (controls) were used.

154 Transgenic Mas-TRECK (mast cell-specific enhancer-mediated toxin receptor-mediated conditional  
155 cell knock out) mice have been previously described by Otsuka et al. and Sawaguchi et al. [29, 30].

156 MCs of this transgenic strain express the human diphtheria toxin receptor (hDTR) under the control

157 of an intronic enhancer (IE) element of the IL-4 gene. MCs in Mas-TRECK mice were conditionally  
158 depleted by intraperitoneal injection of 250 ng Diphtheria toxin (DT) for five consecutive days prior  
159 to the first immunization. Treatment with DT also leads to the complete temporary depletion of  
160 basophils, since they express low levels of hDTR. C57BL/6 mice obtained from Charles River  
161 Laboratories, Sulzfeld, Germany were used as controls. Prior to the experiments, all mice were  
162 genotyped via PCR. To ensure the absence of MCs and  $\gamma\delta$  T cells at the time of immunization,  
163 epidermal sheets and histological cryosections were prepared (Suppl. Fig. 4 and 5).

164

165 TCRd, Mas-TRECK and C57BL/6 mice were kept in the animal facility of the University of Salzburg and  
166 were maintained according to the local animal care guidelines. All animal experiments were  
167 approved by the Austrian Ministry of Science (permit number BMWFV-66.012/0014-  
168 WF/V/3b/2017).

169

#### 170 *Immunizations*

171 Immunizations were performed by laser microporation of the skin using the P.L.E.A.S.E© laser device  
172 (Erbium-Yttrium aluminium garnet laser, Pantec biosolutions) followed by application of P5-MN in  
173 solution to the laser-generated micropores as previously described [4]. Laser microporation was  
174 performed with the following settings: 500 Hz, pulse duration of 50  $\mu$ s, 5% pore density, 3 pulses per  
175 pore and a total fluence of 8.4 J/cm<sup>2</sup>. TCRd<sup>-/-</sup> and heterozygous control mice were immunized on  
176 days 0, 14 and 28 with 1  $\mu$ g P5-MN. MC-depleted Mas-TRECK and C57BL/6 control mice were  
177 immunized on days 0 and 14 with 1  $\mu$ g Phl p 5 mannan.

178

#### 179 **Antigen-specific antibody measurements**

180 10-13 days after the last immunization, mice were sacrificed, and blood samples were drawn either  
181 from the saphenous vein or the retrobulbar sinus. Phl p 5-specific IgG1 antibodies were detected by  
182 luminometric ELISA. To assess cell-bound Phl p 5-specific IgE, a basophil activation test was  
183 conducted as described [31, 32].



184

185

186 **Lymphocyte cultures, flow cytometry, and cytokine measurements**

187 Isolated lymphocytes from spleens and lymph nodes were cultured in a sterile 96-well tissue culture  
188 plate (U-bottom; Greiner) at a density of  $4 \times 10^6$  cells/mL in the presence of 10  $\mu\text{g/mL}$  rPhl p 5 in T cell  
189 medium (RPMI-1640; 10% FCS, 25mM HEPES, 2mM L-Glu, 100  $\mu\text{g/mL}$  streptomycin, 100 U/mL  
190 penicillin) for five days. At day five, culture supernatants were harvested, and cytokine profiles were  
191 assessed either by using ProcartaPlex multiplex cytokine panels (Thermo Fisher) or LegendPlex  
192 Mouse Th cytokine panel (BioLegend), respectively. On the same day, restimulated cells were  
193 analysed by flow cytometry. In brief, cells were washed with DPBS, blocked with an anti-CD16/32  
194 containing hybridoma supernatant, and stained for the extracellular markers using anti-CD4 (APC-  
195 Cy7-labelled; clone GK1.5, eBioscience; 1:400), anti-CD44 (BV650-labelled; clone IM7, BioLegend;  
196 1:100), anti-CD62L (FITC-labelled; clone MEL-14, BioLegend; 1:200) and live/dead staining (fixable  
197 viability dye eFluor 506; Thermo Fisher; 1:1000) for 30 min on 4°C. For intracellular staining, cell  
198 fixation and permeabilization was performed using the FoxP3 Staining Buffer Sets (Tonbo  
199 Biosciences) according to the manufacturer's instructions and 10% naïve mouse serum (in  
200 permeabilization buffer) was used for additional blocking. After 30 min of incubation with  
201 intracellular markers for FoxP3 (APC-labelled; clone FJK-16s, Invitrogen; 1:100), GATA3 (BV421-  
202 labelled; clone 16E10 A23, BioLegend; 1:200), ROR $\gamma$ T (PE-labelled; clone B2D, Thermo Fisher; 1:100)  
203 and T-bet (PE-Cy7-labelled; clone 4B10, BioLegend; 1:100) at RT in the dark, cells were washed twice  
204 with permeabilization buffer and dissolved in FACS buffer (PBS, 1% BSA, 2mM EDTA) for analysis  
205 using a CytoFLEX S flow cytometer (Beckman Coulter).

206

207 **Laser-induced cytokine-milieu in murine skin**

208 Skin areas of TCRd<sup>-/-</sup>, TCRd<sup>+/-</sup>, DT-treated and untreated Mas-TRECK mice were excised 6 hours and 24  
209 hours after laserporation and then homogenized in 20-fold volume of DPBS containing 1% of a  
210 protease inhibitor cocktail (Sigma, P8340) using an Ultra-Turrax homogenizer (Ika, Staufen,

211 Germany). Samples were centrifuged for 10 min at 21.000 x g, and then the supernatants were 0.22  
212  $\mu\text{m}$  filtered and finally analysed for cytokine/chemokine release using the ProcartaPlex multiplex  
213 assay (Thermo Fisher)

214

#### 215 **Statistical analysis**

216 Unpaired or paired Student's t-tests were used for comparing two groups. Effect of genotype and  
217 laser treatment on skin chemokines/cytokines was assessed by two-way ANOVA followed by Tukey's  
218 or Holm-Sidak's post hoc test as indicated (Prism 6, GraphPad Software). Data are expressed as  
219 means  $\pm$  SEM. (P-value range is indicated: \*P<0.05, \*\*P<0.01 and \*\*\*P<0.001). Flow cytometry  
220 profiles and microscopy images are representative of repeated experiments.

221

222 **3. Results**

223 *Contribution of Mast cells and  $\gamma\delta$  T cells to the cytokine/chemokine milieu at the site of laser*  
224 *microporation*

225 Knowing that both  $\gamma\delta$  T cells and MCs are sentinels and damage sensors, we evaluated the  
226 contribution of these cell types to the locally-induced cytokine and chemokine milieu after laser-  
227 induced skin damage. To this end, the skin of TCRd<sup>-/-</sup>, TCRd<sup>+/-</sup>, DT-treated and untreated Mas-TRECK  
228 mice was analysed for cytokine/chemokine secretion either 6 h or 24 h after laser microporation.  
229 Non-laser microporated mice were included as controls. As expected, in wild-type mice, laser  
230 microporation led to an increase of a broad panel of cytokines and chemokines. Both in TCRd<sup>-/-</sup>, TCRd<sup>+/-</sup>  
231 and Mas-TRECK mice, cytokines GRO $\alpha$ , MCP-1, TSLP, IL-6, TNF- $\alpha$ , and MCP-5 peaked 6 h after laser  
232 microporation (Fig. 1, A and B), whereas the highest levels of MIP-1 $\alpha$ , MIP-2, MIP-3 $\alpha$ , RANTES, and  
233 IP-10 were observed at the 24 h time point. Contrary, MIP-1 $\alpha$ , MIP-2, MIP-3 $\alpha$ , RANTES, and IP-10  
234 peaked earlier (6 h) in Mas-TRECK mice (Fig. 1B). Tables 1 and 2 summarize the significant changes in  
235 cytokine/chemokine concentrations in the skin following laser microporation both in TCRd<sup>-/-</sup>, TCRd<sup>+/-</sup>  
236 and Mas-TRECK mice.  $\gamma\delta$  T cells did not alter the locally-induced cytokine/chemokine milieu after  
237 laser microporation, with the exception of RANTES, which was significantly higher in TCR<sup>-/-</sup> mice. Also,  
238 steady-state IL-6 (NS) and MCP-5 (P<0.05) levels were decreased in absence of  $\gamma\delta$  T cells (Fig. 4A). In  
239 accordance with that, we found that IL-6 and MCP-5 peak levels after laser microporation were  
240 elevated in the presence of  $\gamma\delta$  T cells, confirming a significant contribution of  $\gamma\delta$  T cells to the  
241 production/regulation of these chemokines (also see Table 1).

242 In Mas-TRECK mice, we observed a decrease in the secretion of cytokines such as GRO $\alpha$  (P<0.05),  
243 MIP-1 $\alpha$  (NS), MIP-2 $\alpha$  (NS), and TSLP (P<0.05) dependent on the presence of MCs after laser  
244 microporation (Fig. 1B). In addition, we found a DT-mediated effect on the release of all assessed  
245 cytokines/chemokines with the exception of IL-6 and RANTES (significant only for IP-10, see Table 2).

**A.**

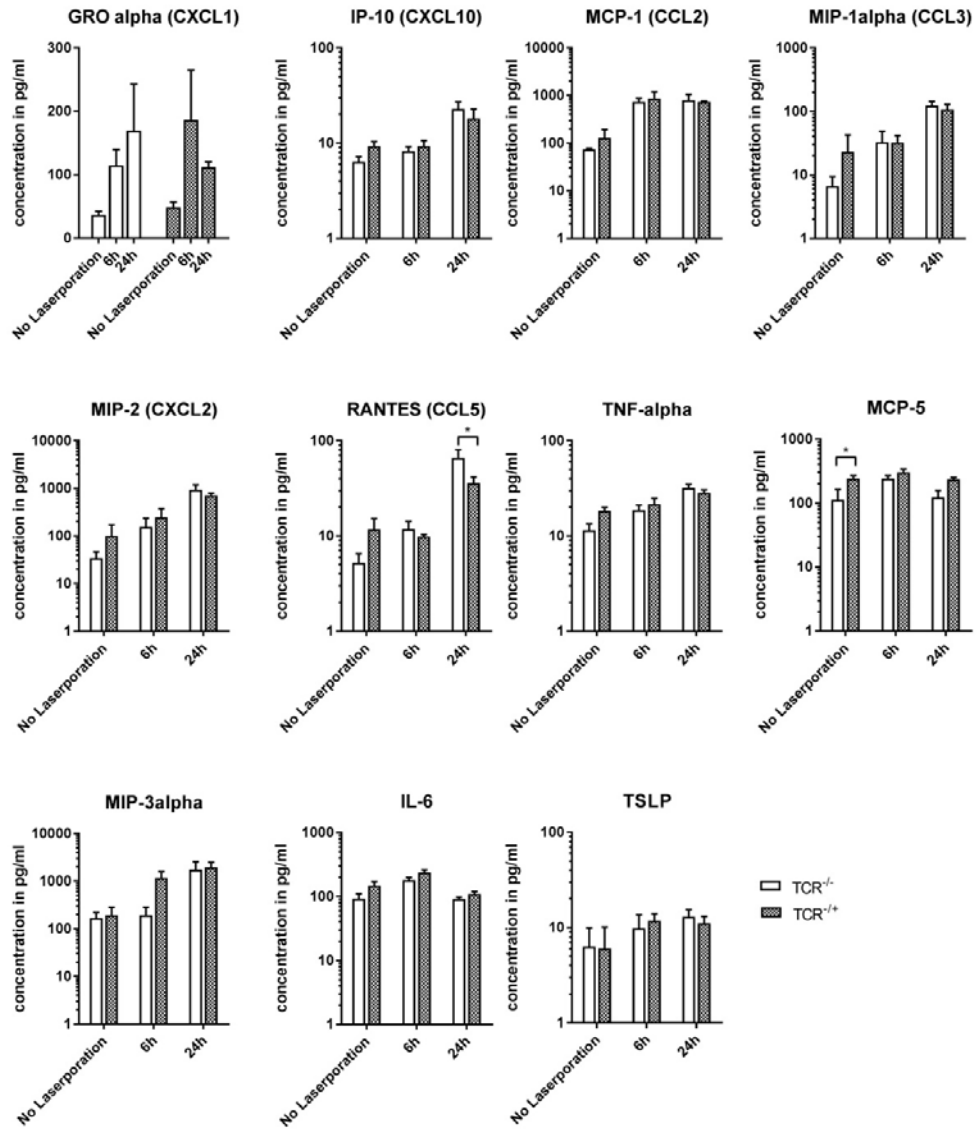

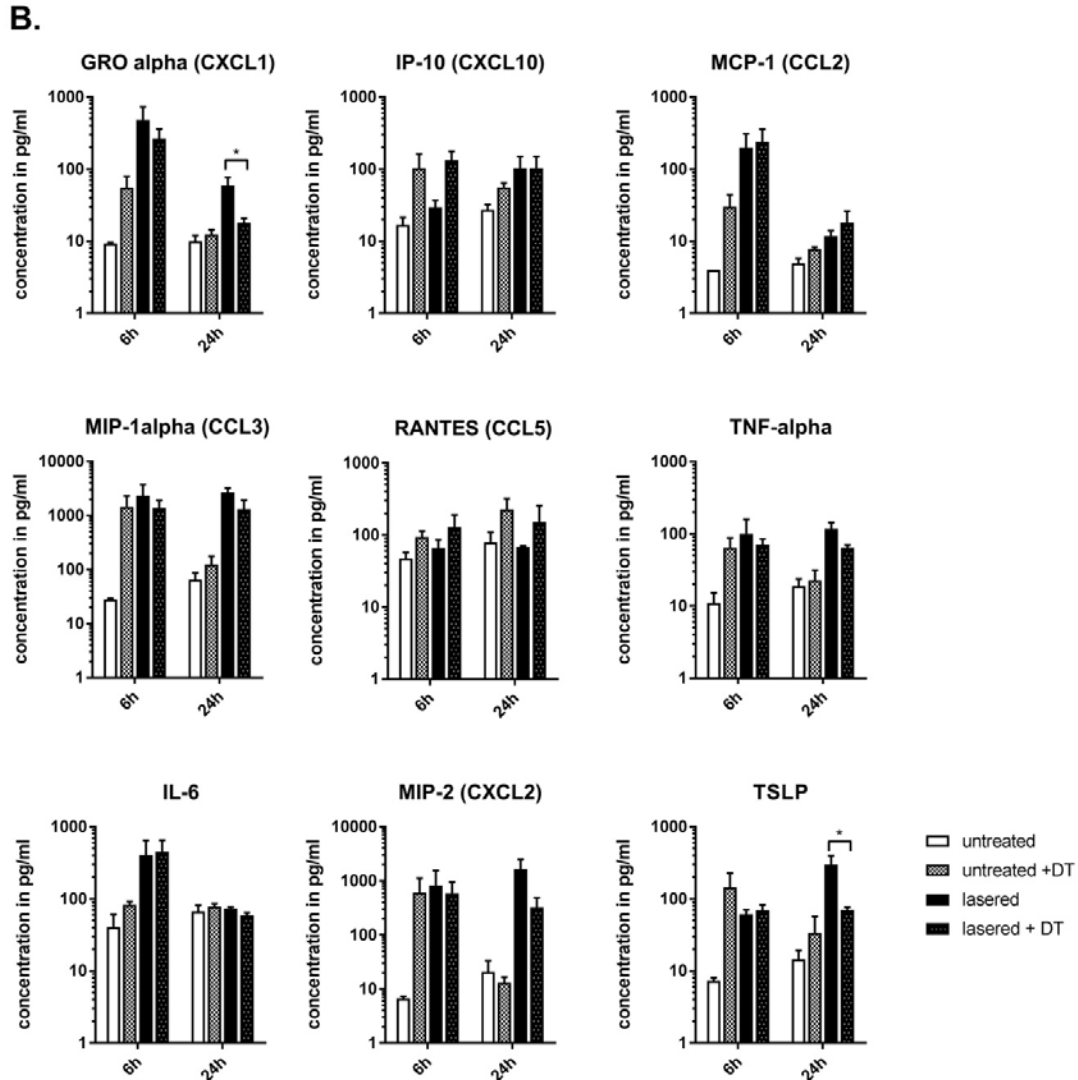

247

248 **Figure 1: Cytokine/chemokine milieu at the site of laser microporation.** Cytokine/chemokine  
 249 concentrations measured in supernatants of homogenized skin from TCRd (A) or MastRECK (B) mice  
 250 6 h and 24 h after laser microporation using cytokine multiplex assay. Non-laser microporated mice  
 251 (untreated) were used as controls. Data (n=4) is depicted as cytokine/chemokine concentration in  
 252 pg/mL. Statistical significance between TCRd<sup>-/-</sup> and TCRd<sup>+/-</sup> mice or MC depleted (+DT) vs non-  
 253 depleted Mas-TRECK mice was assessed by two-way ANOVA followed by Holm-Sidak's multiple  
 254 comparison post hoc test. \* P<0.05.

255

256

257 **Table 1:** Laser-related effects on the cytokine/chemokine milieu 6 h or 24 h in TCRd mice after laser  
 258 microporation. Data was analysed by two-way ANOVA (time 0h, 6h, 24h vs. genotype) and Tukey's  
 259 multiple comparisons test (0h vs. 6h and 0h vs. 24h). \* P<0.05, \*\* P<0.01, \*\*\* P<0.001, \*\*\*\*  
 260 P<0.0001, NS = not significant.

| Cytokine/Chemokine    | 6h laser effect | 24h laser effect | genotype effect |
|-----------------------|-----------------|------------------|-----------------|
| GRO $\alpha$          | NS              | NS               | NS              |
| IL-6                  | ***             | NS               | *               |
| IP-10 (CXCL10)        | NS              | **               | NS              |
| MCP-1 (CCL2)          | NS              | **               | NS              |
| MIP-1 $\alpha$ (CCL3) | NS              | ****             | NS              |
| MIP-2 (CXCL2)         | NS              | ****             | NS              |
| RANTES (CCL5)         | NS              | ****             | NS              |
| MIP-3 $\alpha$        | NS              | **               | NS              |
| TNF- $\alpha$         | NS              | ***              | NS              |
| TSLP                  | NS              | NS               | NS              |
| MCP-5                 | *               | NS               | *               |

261  
 262 **Table 2:** Laser- and DT-related effects on different skin cytokines/chemokines 6 h or 24 h after laser  
 263 microporation in MasTRECK mice were analysed by two-way ANOVA (DT treatment vs. laser  
 264 treatment). \* P<0.05, \*\* P<0.01, NS = not significant.

| Cytokine/Chemokine    | 6h laser effect | 6h DT effect | 24h laser effect | 24h DT effect |
|-----------------------|-----------------|--------------|------------------|---------------|
| GRO $\alpha$          | *               | NS           | *                | NS            |
| IL-6                  | *               | NS           | NS               | NS            |
| IP-10 (CXCL10)        | NS              | *            | NS               | NS            |
| MCP-1 (CCL2)          | *               | NS           | NS               | NS            |
| MIP-1 $\alpha$ (CCL3) | NS              | NS           | **               | NS            |
| MIP-2 (CXCL2)         | NS              | NS           | *                | NS            |
| RANTES (CCL5)         | NS              | NS           | NS               | NS            |
| TNF- $\alpha$         | NS              | NS           | **               | NS            |
| TSLP                  | NS              | NS           | *                | NS            |

265

266 *Mast cells and  $\gamma\delta$  T cells play no essential role in induction of humoral Th2 responses after EPI*

267 To investigate the role of  $\gamma\delta$  T cells and MCs in the systemic immune response after EPI with P5-MN,  
 268 specific IgG1 and cell-bound IgE levels were measured by ELISA and BAT, respectively. Elevated IgG1  
 269 serum levels and cell-bound Phl p 5-specific IgE were found in all groups after EPI, suggesting an  
 270 ongoing humoral immune response. In general, TCRd mice produced higher levels of IgG1 and IgE  
 271 compared to Mas-TRECK mice (C57BL/6) due to their BALB/c genetic background. Unlike TCRd<sup>-/-</sup>,  
 272 TCRd<sup>+/-</sup> mice showed no reduction of antigen-specific IgG1 production after EPI with P5-MN (Fig. 2A).  
 273 However, we found a significant decrease in serum IgG1 levels in MC-depleted Mas-TRECK mice  
 274 compared to C57BL/6 WT mice, thereby indicating at least a partial role of MCs in the TH2-

275 dependent switch to IgG1. Despite the differences in IgG1 levels in MC-depleted mice, in our  
276 experimental setting, we observed no significant differences in cell-bound antigen-specific IgE.  
277 Furthermore, cell-bound antigen-specific IgE levels were comparable between TCRd<sup>-/-</sup> and TCRd<sup>+/-</sup>  
278 mice (Fig 2B). Thus, both  $\gamma\delta$  T cells as well as MCs play no major role in the induction of humoral TH2  
279 responses after two (MCs) or three ( $\gamma\delta$  T cells) epicutaneous immunizations with P5-MN.  
280

281

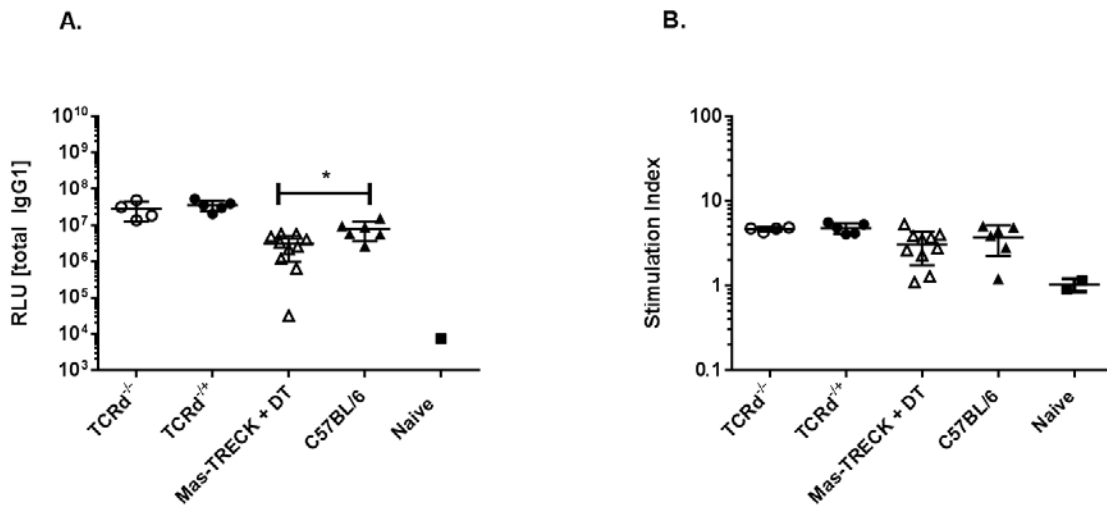

282

283 **Figure 2. Antigen-specific IgG1 and IgE antibody titers after laser-mediated EPI with P5-MN. A)**  
284 **A luminometric ELISA was performed with 1:1000 diluted serum samples and Phl p 5-specific IgG1**  
285 **levels were measured in terms of RLU (relative light units) B) The basophil activation due to IgE**  
286 **crosslinking after restimulation with 10 ng/mL Phl p 5 was measured in terms of CD200R**  
287 **upregulation via flow cytometry. Mean fluorescence intensity (MFI) of CD200R was normalized to**  
288 **untreated samples. TCRd<sup>-/-</sup> (n=4), TCRd<sup>+/-</sup> (n=6), DT-treated Mas-TRECK (n=10), C57BL/6 (n=6) mice**  
289 **and naïve (n=1-2) mice. \*P<0.05**

290

291 *TH2 cytokine production following EPI is elevated in the absence of mast cells*

292 Having found that both  $\gamma\delta$  T cells and MCs had little effect on humoral TH2 responses, we were  
293 prompted to investigate whether these cells influence TH2 cytokine release. To address this  
294 question, splenocytes from immunized mice and naïve controls were restimulated with Phl p 5 *in*  
295 *vitro* for five days and cytokine secretion was measured by ProcartpaPlex/LegendPlex multiplex  
296 analysis. Whereas splenocytes from naïve mice displayed only low baseline secretion of cytokines  
297 upon Phl p 5 exposure (<10pg/mL for TNF- $\alpha$ , GRO $\alpha$ , IL-5, and IL-13; all others <1pg/mL), splenocytes  
298 from immunized mice produced significant amounts of pro-inflammatory, TH1, TH2, and TH17  
299 cytokines. As expected, splenocytes from MastRECK mice secreted higher levels of the TH1 cytokine  
300 IFN- $\gamma$  and lower levels of TH2 cytokines IL-4, IL-5, and IL-13 compared to TCRd mice due to their  
301 genetic background. Again, we observed no significant changes in the secretion of cytokines between  
302 TCRd<sup>-/-</sup> and TCRd<sup>+/-</sup> mice in our experiments (Fig. 3A). We also found no major differences between  
303 MC-depleted mice and C57BL/6 control mice except for slightly higher concentrations of IL-4 and IL-



304 10 (Fig. 3B). Additionally, we detected increased levels of the TH2 cytokines IL-4, IL-5 and IL-10 in *ex*  
305 *vivo* restimulated cells from draining lymph nodes from MC-depleted Mas-TRECK mice (Suppl. Fig. 6).  
306 Taken together, these findings suggest that in our experimental setting, the induction of TH2  
307 cytokines was elevated in the absence of MCs, which is in contrast to the observed reduction of IgG1.  
308 The secretion of pro-inflammatory, TH1 and TH17 cytokines, however, was found to be independent  
309 from the presence of MCs.  $\gamma\delta$  T cells had no effect on the TH cell profile induced by EPI.

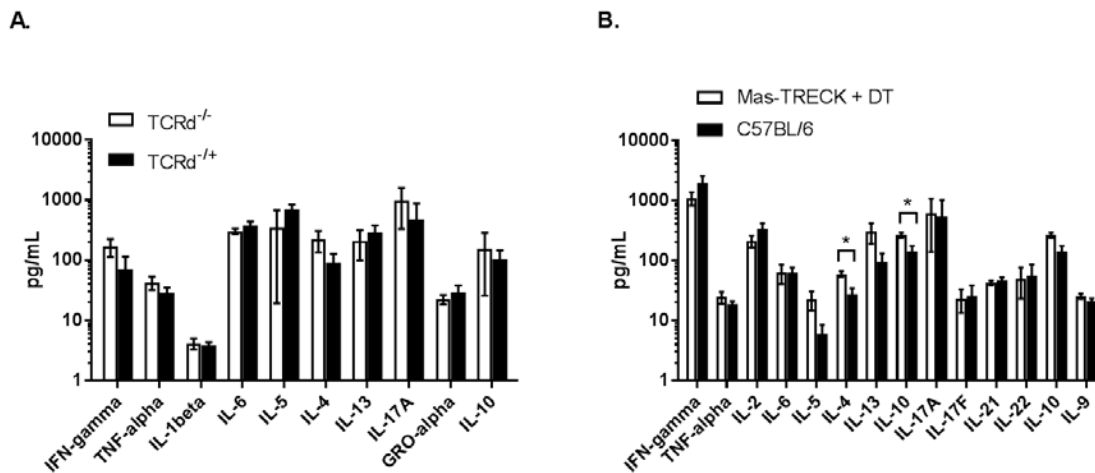

310  
311 **Figure 3: Cytokine profiles of cultured splenocytes from immunized mice.** Cytokine production in  
312 cell culture supernatants of restimulated splenocytes was measured using ProcartpaPlex (A) or  
313 LegendPlex (B) multiplex analysis. **A.)** TCRd<sup>-/-</sup> (n=4), TCRd<sup>+/+</sup> (n=5), and **B.)** DT-treated Mas-TRECK  
314 (n=10) and C57BL/6 (n=6) mice). \*P<0.05

315

316 *Presence of mast cells contributes to T cell activation and maturation but not to T helper polarization*

317 Based on the differences we detected in cytokine secretion profiles of restimulated splenocytes and  
318 SDLN cells at least in MC-depleted mice, we asked whether  $\gamma\delta$  T cells or MCs influence T cell  
319 activation or polarization.

320 Analysis of intra- and extracellular staining of Phl p 5-restimulated SDLN cells revealed no differences  
321 in the percentages of naïve, central memory, and effector CD4<sup>+</sup> T cells or the amount of transcription  
322 factor expression between TCRd<sup>-/-</sup> and TCRd<sup>+/+</sup> groups (Fig. 4). While the percentage of naïve CD4<sup>+</sup> T  
323 cells was significantly higher in MC-depleted mice, the amount of effector T cells was lower, thereby  
324 implying a role of MCs in T cell activation and maturation. In particular, we found that expression of

325 key TH transcription factors T-bet, GATA3, ROR $\gamma$ t and FoxP3 was independent of MC depletion. Thus,  
326 we could not confirm an influence of MCs on TH2 polarization on the transcription factor level.

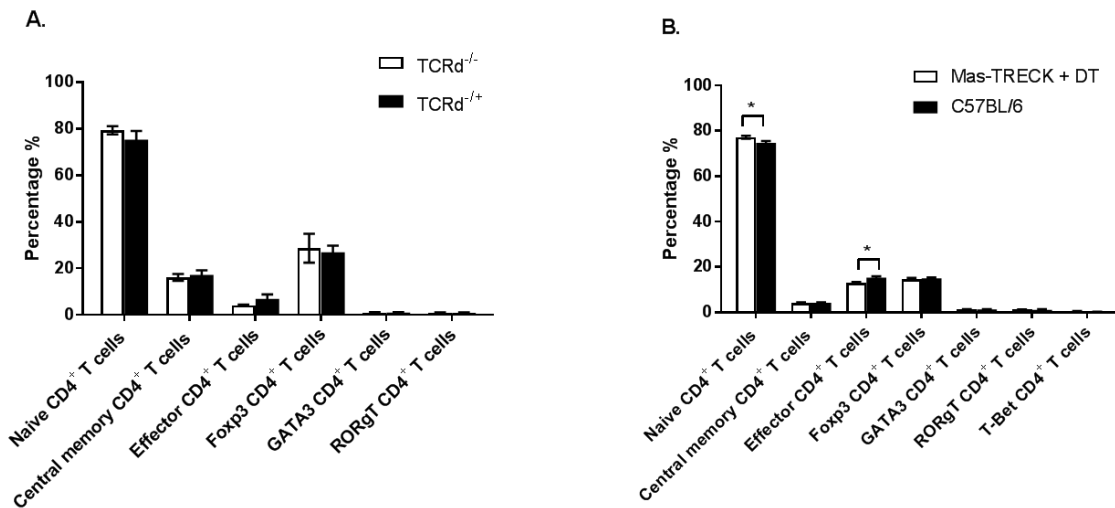

327

328

329

330

331

332

333

334

335

336

337

**Figure 4: T helper polarization in Phl p 5-restimulated SDLN cells.** Extracellular markers CD4, CD62L and CD44 were used to determine the distribution of naïve, central memory, and effector CD4<sup>+</sup> T cells. Viable and singlet CD4<sup>+</sup> T cell subset distribution and the percentage of FoxP3, GATA3, ROR $\gamma$ T and T-bet-producing CD4<sup>+</sup> T cells was determined using flow cytometry. **A.)** TCRd<sup>-/-</sup> (n=4), TCRd<sup>+/+</sup> (n=5), **B.)** DT-treated Mas-TRECK (n=10) and C57BL/6 (n=6). \*P<0.05

338 **4. Discussion**

339 Laser microporation represents a novel method for skin-based vaccination exploiting the richness of  
340 superficial skin layers in antigen presenting cells. Furthermore, the microporation process itself has  
341 been shown to locally create an inflammatory milieu, thereby providing an adjuvant effect, which  
342 potentially obviates the need for adjuvants in vaccine formulations. By targeting receptors on  
343 dendritic cells with antigen coupled to glycans such as mannan, we have also demonstrated that a  
344 synergistic effect between microporation and directly addressing antigen presenting cells can be  
345 achieved, which could not be observed following intradermal injection [17]. Whereas the role of  
346 various skin-resident dendritic cell types and Langerhans cells in eliciting immune responses  
347 following laser-facilitated skin immunization has been studied in detail [33-35], it remains to be  
348 elucidated whether innate immune cells contribute to these reactions. In the current study we  
349 therefore investigated the impact of  $\gamma\delta$  T cells and MCs for production of specific antibodies as well  
350 as local and systemic chemokine and cytokine secretion following laser-mediated EPI. As antigen we  
351 chose the grass-pollen allergen Phl p 5 coupled to mannan, which is a promising candidate for  
352 allergen-specific immunotherapy via the skin as it combines high immunogenicity with low  
353 allergenicity [17].

354 Skin-resident dendritic epidermal T cells (DETCs) in mice as well as their human counterparts  
355 exclusively express  $\gamma\delta$  T cell receptors and are able to modulate immune responses initiated in the  
356 epithelium. Both have been implicated in maintenance of the immunologic integrity of the skin  
357 acting as sensors of cellular dysregulation by recognizing microbial moieties or ligands expressed by  
358 tumor cells [23, 36]. As it has been previously shown that DETCs are essential for strong TH2-  
359 associated atopic responses upon antigen encounter in context with cutaneous epithelial stress, it  
360 was obvious to investigate the role of these cells in immune reactions following antigen delivery via  
361 barrier disrupted skin.

362 Our current study shows that the role of  $\gamma\delta$  T cells in shaping the local cytokine/chemokine milieu  
363 following laser microporation is marginal and they consequently have no effect on eliciting adaptive  
364 immune responses after laser-mediated EPI.

365 Upon activation, DETCs have been reported to be potent producers of pro-inflammatory cytokines  
366 such as IL-2, IL-3, GM-CSF, IFN- $\gamma$  and TNF- $\alpha$  and they can also produce TH1 effector cytokines (IFN- $\gamma$ ,  
367 TNF- $\alpha$ ), TH2 effector cytokines (IL-4, IL-5, IL-10, IL-13) and TH17 effector cytokines (IL-17) [37, 38].  
368 Additionally, activated  $\gamma\delta$  T cells are known to secrete the chemokines lymphotactin (XCL1) and  
369 RANTES (CCL5) [22] and also produce the macrophage-homing chemokines MIP-1 $\alpha$  (CCL3) and MIP-  
370 1 $\beta$  (CCL4) [39]. However, we found that the cytokine and chemokine expression in the skin after laser  
371 microporation is largely independent of  $\gamma\delta$  T cell presence (Fig. 1A and Table 1). A surprising finding  
372 was that the production of both IL-6 and MCP-5 (CCL12) was reduced in untreated mice lacking  $\gamma\delta$  T  
373 cells, thereby suggesting them to play a role in steady-state production of these chemokines (Fig.  
374 1A).

375

376 In our experimental setting, the induction of antigen-specific IgG1 and IgE (Fig 1.) and the secretion  
377 of TH2 cytokines such as IL-4, IL-5, IL-10 and IL-13 of *in vitro* restimulated splenocytes (Fig. 3A) do  
378 not differ between TCRd<sup>-/-</sup> and TCRd<sup>+/-</sup> mice and therefore do not depend on the presence of  $\gamma\delta$  T  
379 cells.

380 In contrast, Strid et al. have demonstrated a crucial role for  $\gamma\delta$  T cells in producing antigen-specific  
381 IgG1 and IgE after allergen application to stressed epithelia [23]. However, in this study a different  
382 method for barrier disruption, i.e. tape stripping, was used. By repeatedly pressing an adhesive film  
383 to the surface of the skin and then abruptly removing it, only the uppermost skin layers, the stratum  
384 corneum, gets abraded. Unlike laser microporation, this technique has to be rated as much less  
385 invasive. Also the tape-stripped skin area is inevitably larger compared to the constrained area of 10  
386 mm<sup>2</sup> treated with the laser, on which the (epi)dermal tissue between the micropores is left intact  
387 [16]. In the above mentioned work, communication between epithelial cells and DETCs via the  
388 activating receptor NKG2D was crucial for induction of TH2-biased responses. One could speculate  
389 that repeated tape-stripping induces a more pronounced upregulation of the NKG2D ligand Rae-1 on  
390 keratinocytes than laser microporation, thereby leading to enhanced activation of DETCs. Finally,  
391 besides the diverging technique used for barrier disruption, Strid et al. applied not only a different

392 allergen, i.e. ovalbumin, but also a higher dosage (100  $\mu$ g vs. 1  $\mu$ g) compared to our approach, a fact  
393 that could also contribute to the discrepant outcomes.

394 Taken together, our data indicate that systemic immune responses following laser-mediated EPI are  
395 not significantly modulated or regulated by  $\gamma\delta$  T cells, however; we propose that  $\gamma\delta$  T cells are rather  
396 responsible for shaping the local inflammatory milieu under steady state conditions.

397

398 MCs act as potent producers of various pro-inflammatory and TH2 cytokines [40, 41] and have been  
399 attributed to play a role in DC stimulation and migration. Furthermore, MCs can both directly or  
400 indirectly regulate T cell recruitment, activation, proliferation, and cytokine secretion (reviewed in  
401 [42]). Therefore, we hypothesized that MC and basophil depletion would impair TH2 polarization and  
402 consequently promote TH1 responses.

403 However, the cytokine and chemokine milieu in the skin after laser microporation was largely  
404 unaffected by the depletion of MCs with the exception of TSLP and GRO $\alpha$ , which were significantly  
405 downregulated in MC-depleted mice. Similarly, a decreased induction of MIP-1 $\alpha$ , and MIP-2 $\alpha$  was  
406 detected in the absence of MCs (not significant). Interestingly, we observed that DT treatment by  
407 itself caused the induction of most skin chemokines. We thus reasoned that the DT-induced  
408 depletion of MCs leads to the release of immune mediators and alarmins from necrotic MCs and  
409 causes the activation of other skin-resident innate cells.

410 Nevertheless, depletion of MCs had only slight effects on the adaptive T cell response after EPI.  
411 Consistent with our stated hypothesis, MC-depleted mice show significantly decreased Phl p 5-  
412 specific serum IgG1 titers compared to C57BL/6 control mice after EPI (Fig. 2A). Thus, it should be  
413 considered that MC play a potential role in the TH2-dependent class switch to IgG1. In contrast to  
414 those findings, antigen-specific cell-bound IgE levels were not affected by the presence of MCs (Fig.  
415 2B). However, we found no difference in the secretion of pro-inflammatory cytokines by antigen-  
416 restimulated lymphocytes between MC-depleted and WT C57BL/6 control mice (Fig. 3B).  
417 Unexpectedly, we observed an increased production of IL-4 and IL-10 by antigen-restimulated  
418 splenocytes in MC-depleted mice contrasting our finding of reduced serum IgG1 (Fig. 2A). As

419 basophils, which are known to secrete large amounts of IL-4 after IL-33-stimulation, are depleted  
420 alongside MCs in our model, this is even more surprising. Thus, our results are contrary to data  
421 proposing either a role of MCs in promoting TH2 immunity in response to skin barrier disruption [43]  
422 or in promoting TH1/TH17 polarization [44]. Since cytokine expression was measured 12 days after  
423 the second immunization has been performed, we speculate that MCs and basophils only influence  
424 the early cytokine expression, but are rather dispensable in shaping the adaptive immune response  
425 after two or more epicutaneous immunizations using laser microporation.

426 FACS analysis revealed that MC-depleted mice show a significantly higher percentage of naïve T cells  
427 among isolated lymphocytes, compared to WT control mice (Fig. 4) and a concomitant decrease of  
428 effector T cells, confirming a role of MCs in T cell activation/maturation. This is consistent with data  
429 indicating a role for MCs in priming of DCs via ICAM/LFA-1 that can in turn enhance T cell priming [29,  
430 45]. In line with our cytokine data, we observed no difference in transcription factor expression  
431 between MC-depleted mice and WT mice, thereby suggesting that MCs are dispensable for T helper  
432 cell polarization via transcription factor expression. Collectively, we propose that MCs are mostly  
433 dispensable for humoral TH2-immune responses in laser-mediated EPI, but may play a role in T cell  
434 activation/maturation. Finally, we concluded that MCs contribute to the laser-induced cytokine  
435 profile by either secretion or regulation of TSLP and GRO $\alpha$ .

436

## 437 **6. Conclusion**

438 In summary, we did not observe a major role of  $\gamma\delta$  T cells or MCs in shaping the immune response  
439 after laser-mediated EPI with Phl p 5 mannan. However, they can contribute to the steady-state or  
440 damage-induced cytokine milieu in the skin, respectively.

441

## 442 **7. Limitations of the study**

443 C57BL/6 mice have the same genetic background as Mas-TRECK mice and were furthermore born  
444 and held in the same animal facility. While they should be a suitable control group in respect of  
445 certain factors like their specific microbiome, they did not undergo DT treatment and are therefore

446 not an optimal control. Due to their low expression of the human DTR, DT treatment also results in  
447 transient basophil depletion. Furthermore, we have shown that DT-treatment can alter the  
448 chemokine milieu in the skin. Thus, immunological outcomes in the subsequent experiments cannot  
449 be considered solely a MC-dependent effect, but rather have to be considered MC- or basophil-  
450 dependent or DT-induced. This is of special interest regarding TH2 cytokine expression, since  
451 basophils are known to be producers of IL-4 and hence able to promote TH2 polarization. To  
452 overcome these limitations and exclusively elucidate the role of MCs in EPI in further studies novel  
453 constitutive or inducible MC-deficient models like *Mcpt5-Cre*, *R-DTA*, *Mcpt5-Cre* or *iDTR* might be  
454 employed.

455

## 456 **8. Acknowledgements**

457 The authors would like to thank Dr. Masato Kubo, and Dr. Marcus Maurer for providing Mas-TRECK  
458 mice for this study.

459

## 460 **9. Conflict of interest**

461 The authors have no conflict of interest.

462

## 463 **10. References**

- 464 [1] Liang F, Lore K. Local innate immune responses in the vaccine adjuvant-injected muscle. *Clin*  
465 *Transl Immunology*. 2016;5:e74.
- 466 [2] Nicolas JF, Guy B. Intradermal, epidermal and transcutaneous vaccination: from immunology to  
467 clinical practice. *Expert Rev Vaccines*. 2008;7:1201-14.
- 468 [3] Kim YC, Prausnitz MR. Enabling skin vaccination using new delivery technologies. *Drug Deliv Transl*  
469 *Res*. 2011;1:7-12.
- 470 [4] Bach D, Weiss R, Hessenberger M, Kitzmueller S, Weinberger EE, Krautgartner WD, et al.  
471 Transcutaneous immunotherapy via laser-generated micropores efficiently alleviates allergic asthma  
472 in Phl p 5-sensitized mice. *Allergy*. 2012;67:1365-74.
- 473 [5] Park JH, Lee JW, Kim YC, Prausnitz MR. The effect of heat on skin permeability. *Int J Pharm*.  
474 2008;359:94-103.
- 475 [6] Wang J, Shah D, Chen X, Anderson RR, Wu MX. A micro-sterile inflammation array as an adjuvant  
476 for influenza vaccines. *Nat Commun*. 2014;5:4447.
- 477 [7] Hessenberger M, Weiss R, Weinberger EE, Boehler C, Thalhamer J, Scheibelhofer S. Transcutaneous  
478 delivery of CpG-adjuvanted allergen via laser-generated micropores. *Vaccine*. 2013;31:3427-34.

- 479 [8] Terhorst D, Fossum E, Baranska A, Tamoutounour S, Malosse C, Garbani M, et al. Laser-assisted  
480 intradermal delivery of adjuvant-free vaccines targeting XCR1+ dendritic cells induces potent  
481 antitumoral responses. *J Immunol.* 2015;194:5895-902.
- 482 [9] Kupper TS, Fuhlbrigge RC. Immune surveillance in the skin: mechanisms and clinical  
483 consequences. *Nat Rev Immunol.* 2004;4:211-22.
- 484 [10] Kenney RT, Frech SA, Muenz LR, Villar CP, Glenn GM. Dose sparing with intradermal injection of  
485 influenza vaccine. *N Engl J Med.* 2004;351:2295-301.
- 486 [11] Van Damme P, Oosterhuis-Kafeja F, Van der Wielen M, Almagor Y, Sharon O, Levin Y. Safety and  
487 efficacy of a novel microneedle device for dose sparing intradermal influenza vaccination in healthy  
488 adults. *Vaccine.* 2009;27:454-9.
- 489 [12] Taddio A, Ipp M, Thivakaran S, Jamal A, Parikh C, Smart S, et al. Survey of the prevalence of  
490 immunization non-compliance due to needle fears in children and adults. *Vaccine.* 2012;30:4807-12.
- 491 [13] Lepenies B, Lee J, Sonkaria S. Targeting C-type lectin receptors with multivalent carbohydrate  
492 ligands. *Adv Drug Deliv Rev.* 2013;65:1271-81.
- 493 [14] Johannssen T, Lepenies B. Glycan-Based Cell Targeting To Modulate Immune Responses. *Trends*  
494 *Biotechnol.* 2017;35:334-46.
- 495 [15] Hoving JC, Wilson GJ, Brown GD. Signalling C-type lectin receptors, microbial recognition and  
496 immunity. *Cell Microbiol.* 2014;16:185-94.
- 497 [16] Benito-Villalvilla C, Soria I, Subiza JL, Palomares O. Novel vaccines targeting dendritic cells by  
498 coupling allergoids to mannan. *Allergo J Int.* 2018;27:256-62.
- 499 [17] Machado Y, Duinkerken S, Hoepflinger V, Mayr M, Korotchenko E, Kurtaj A, et al. Synergistic  
500 effects of dendritic cell targeting and laser-microporation on enhancing epicutaneous skin  
501 vaccination efficacy. *J Control Release.* 2017;266:87-99.
- 502 [18] Wood LC, Jackson SM, Elias PM, Grunfeld C, Feingold KR. Cutaneous barrier perturbation  
503 stimulates cytokine production in the epidermis of mice. *J Clin Invest.* 1992;90:482-7.
- 504 [19] Chen X, Wang J, Shah D, Wu MX. An update on the use of laser technology in skin vaccination.  
505 *Expert Rev Vaccines.* 2013;12:1313-23.
- 506 [20] Gutowska-Owsiak D, Ogg GS. The epidermis as an adjuvant. *J Invest Dermatol.* 2012;132:940-8.
- 507 [21] Jameson J, Havran WL. Skin gammadelta T-cell functions in homeostasis and wound healing.  
508 *Immunol Rev.* 2007;215:114-22.
- 509 [22] Hayday AC. Gammadelta T cells and the lymphoid stress-surveillance response. *Immunity.*  
510 2009;31:184-96.
- 511 [23] Strid J, Sobolev O, Zafirova B, Polic B, Hayday A. The intraepithelial T cell response to NKG2D-  
512 ligands links lymphoid stress surveillance to atopy. *Science.* 2011;334:1293-7.
- 513 [24] Abraham SN, St John AL. Mast cell-orchestrated immunity to pathogens. *Nat Rev Immunol.*  
514 2010;10:440-52.
- 515 [25] Theoharides TC, Alysandratos KD, Angelidou A, Delivanis DA, Sismanopoulos N, Zhang B, et al.  
516 Mast cells and inflammation. *Biochim Biophys Acta.* 2012;1822:21-33.
- 517 [26] Kulka M, Sheen CH, Tancowny BP, Grammer LC, Schleimer RP. Neuropeptides activate human  
518 mast cell degranulation and chemokine production. *Immunology.* 2008;123:398-410.
- 519 [27] Walker ME, Hatfield JK, Brown MA. New insights into the role of mast cells in autoimmunity:  
520 evidence for a common mechanism of action? *Biochim Biophys Acta.* 2012;1822:57-65.
- 521 [28] Marichal T, Tsai M, Galli SJ. Mast cells: potential positive and negative roles in tumor biology.  
522 *Cancer Immunol Res.* 2013;1:269-79.
- 523 [29] Otsuka A, Kubo M, Honda T, Egawa G, Nakajima S, Tanizaki H, et al. Requirement of interaction  
524 between mast cells and skin dendritic cells to establish contact hypersensitivity. *PLoS One.*  
525 2011;6:e25538.
- 526 [30] Sawaguchi M, Tanaka S, Nakatani Y, Harada Y, Mukai K, Matsunaga Y, et al. Role of mast cells  
527 and basophils in IgE responses and in allergic airway hyperresponsiveness. *J Immunol.*  
528 2012;188:1809-18.
- 529 [31] Scheibelhofer S, Strobl A, Hoepflinger V, Thalhamer T, Steiner M, Thalhamer J, et al. Skin  
530 vaccination via fractional infrared laser ablation - Optimization of laser-parameters and  
531 adjuvantation. *Vaccine.* 2017;35:1802-9.



- 532 [32] Weinberger EE, Isakovic A, Scheiblhofer S, Ramsauer C, Reiter K, Hauser-Kronberger C, et al. The  
533 influence of antigen targeting to sub-cellular compartments on the anti-allergic potential of a DNA  
534 vaccine. *Vaccine*. 2013;31:6113-21.
- 535 [33] Chen X, Shah D, Kosiratna G, Manstein D, Anderson RR, Wu MX. Facilitation of transcutaneous  
536 drug delivery and vaccine immunization by a safe laser technology. *J Control Release*. 2012;159:43-  
537 51.
- 538 [34] Weiss R, Hessenberger M, Kitzmuller S, Bach D, Weinberger EE, Krautgartner WD, et al.  
539 Transcutaneous vaccination via laser microporation. *J Control Release*. 2012;162:391-9.
- 540 [35] Chen X, Zeng Q, Wu MX. Improved efficacy of dendritic cell-based immunotherapy by cutaneous  
541 laser illumination. *Clin Cancer Res*. 2012;18:2240-9.
- 542 [36] Bergstresser PR, Cruz PD, Jr., Takashima A. Dendritic epidermal T cells: lessons from mice for  
543 humans. *J Invest Dermatol*. 1993;100:80S-3S.
- 544 [37] Boismenu R, Hobbs MV, Boullier S, Havran WL. Molecular and cellular biology of dendritic  
545 epidermal T cells. *Semin Immunol*. 1996;8:323-31.
- 546 [38] Martin B, Hirota K, Cua DJ, Stockinger B, Veldhoen M. Interleukin-17-producing gammadelta T  
547 cells selectively expand in response to pathogen products and environmental signals. *Immunity*.  
548 2009;31:321-30.
- 549 [39] Boismenu R, Feng L, Xia YY, Chang JC, Havran WL. Chemokine expression by intraepithelial  
550 gamma delta T cells. Implications for the recruitment of inflammatory cells to damaged epithelia. *J*  
551 *Immunol*. 1996;157:985-92.
- 552 [40] Moulin D, Donze O, Talabot-Ayer D, Mezin F, Palmer G, Gabay C. Interleukin (IL)-33 induces the  
553 release of pro-inflammatory mediators by mast cells. *Cytokine*. 2007;40:216-25.
- 554 [41] Schmitz J, Owyang A, Oldham E, Song Y, Murphy E, McClanahan TK, et al. IL-33, an interleukin-1-  
555 like cytokine that signals via the IL-1 receptor-related protein ST2 and induces T helper type 2-  
556 associated cytokines. *Immunity*. 2005;23:479-90.
- 557 [42] Bulfone-Paus S, Bahri R. Mast Cells as Regulators of T Cell Responses. *Front Immunol*.  
558 2015;6:394.
- 559 [43] Hammad H, Lambrecht BN. Barrier Epithelial Cells and the Control of Type 2 Immunity.  
560 *Immunity*. 2015;43:29-40.
- 561 [44] Dudeck A, Suender CA, Kostka SL, von Stebut E, Maurer M. Mast cells promote Th1 and Th17  
562 responses by modulating dendritic cell maturation and function. *Eur J Immunol*. 2011;41:1883-93.
- 563 [45] Balkow S, Heinz S, Schmidbauer P, Kolanus W, Holzmann B, Grabbe S, et al. LFA-1 activity state  
564 on dendritic cells regulates contact duration with T cells and promotes T-cell priming. *Blood*.  
565 2010;116:1885-94.
- 566
